## Original Articles

# The demonstration of $\alpha$ Klotho deficiency in human chronic kidney disease with a novel synthetic antibody

Sarah L. Barker<sup>1</sup>, Johanne Pastor<sup>2</sup>, Danielle Carranza<sup>1</sup>, Henry Quiñones<sup>3</sup>, Carolyn Griffith<sup>4</sup>, Regina Goetz<sup>5</sup>, Moosa Mohammadi<sup>5</sup>, Jianfeng Ye<sup>4</sup>, Jianning Zhang<sup>3</sup>, Ming Chang Hu<sup>3,4</sup>, Makoto Kuro-o<sup>2,4,\*</sup>, Orson W. Moe<sup>3,4,6,\*</sup> and Sachdev S. Sidhu<sup>1,\*</sup>

<sup>1</sup>Banting and Best Department of Medical Research and Department of Molecular Genetics, The Donnelly Centre, University of Toronto, Toronto, ON, Canada, <sup>2</sup>Department of Pathology, University of Texas Southwestern Medical Center, Dallas, TX, USA, <sup>3</sup>Department of Internal Medicine, University of Texas Southwestern Medical Center, Dallas, TX, USA, <sup>4</sup>Charles and Jane Pak Center for Mineral Metabolism and Clinical Research, University of Texas Southwestern Medical Center, Dallas, TX, USA, <sup>5</sup>Department of Biochemistry and Molecular Pharmacology, New York University School of Medicine, New York, NY, USA and <sup>6</sup>Department of Physiology, University of Texas Southwestern Medical Center, Dallas, TX, USA

Correspondence and offprint requests to: Sachdev Sidhu; E-mail: sachdev.sidhu@utoronto.ca

\*M.K., O.W.M. and S.S.S. contributed equally to the study.

### ABSTRACT

**Background.**  $\alpha$ Klotho is the prototypic member of the Klotho family and is most highly expressed in the kidney.  $\alpha$ Klotho has pleiotropic biologic effects, and in the kidney, its actions include regulation of ion transport, cytoprotection, anti-oxidation and anti-fibrosis. In rodent models of chronic kidney disease (CKD),  $\alpha$ Klotho deficiency has been shown to be an early biomarker as well as a pathogenic factor. The database for  $\alpha$ Klotho in human CKD remains controversial even after years of study.

**Methods.** We used a synthetic antibody library to identify a high-affinity human antigen-binding fragment that recognizes human, rat and mouse  $\alpha$ Klotho primarily in its native, rather than denatured, form.

**Results.** Using an immunoprecipitation–immunoblot (IP–IB) assay, we measured both serum and urinary levels of full-length soluble  $\alpha$ Klotho in humans and established that human CKD is associated with  $\alpha$ Klotho deficiency in serum and urine.  $\alpha$ Klotho levels were detectably lower in early CKD preceding disturbances in other parameters of mineral metabolism and progressively declined with CKD stages. We also found that exogenously added  $\alpha$ Klotho is inherently unstable in the CKD milieu suggesting that decreased

production may not be the sole reason for  $\alpha$ Klotho deficiency.

**Conclusion.** Synthetic antibody libraries harbor tremendous potential for a variety of biomedical and clinical applications. Using such a reagent, we furnish data in support of  $\alpha$ Klotho deficiency in human CKD, and we set the foundation for the development of diagnostic and therapeutic applications of anti- $\alpha$ Klotho antibodies.

**Keywords:** assay, chronic kidney disease, klotho, synthetic antibodies

### INTRODUCTION

$\alpha$ Klotho was identified as an anti-aging substance [1, 2] but has diverse effects including regulating ion transport, Wnt and insulin signaling, renin-angiotensin system, stem cells, carcinogenesis, fibrosis and oxidative stress. The highest level of expression of  $\alpha$ Klotho is in the kidney [1, 3, 4]. In addition to its transmembrane form, which is a co-receptor for fibroblast growth factor (FGF) 23 [5–7],  $\alpha$ Klotho is released into the circulation, urine and cerebrospinal fluid as an endocrine substance [3, 8, 9] generated by transcript splicing into a truncated peptide [10] or proteolytic release by secretases [11, 12]. A

substantial portion of the circulating  $\alpha$ Klotho is nephrogenic in origin [13], posing the questions of whether kidney disease begets systemic  $\alpha$ Klotho deficiency and whether there are dire downstream consequences of this deficiency. The phenotypic similarities between genetic  $\alpha$ Klotho ablation and chronic kidney disease (CKD) support the notion that  $\alpha$ Klotho deficiency is pathogenic [1, 14].

Reduced renal  $\alpha$ Klotho transcript or protein levels [8, 15–21] and serum  $\alpha$ Klotho concentration [8, 17] were demonstrated in rodent CKD from nephron reduction surgery, ischemia reperfusion injury, immune complex glomerulonephritis, polygenic or hormonal hypertension, metabolic syndrome and diabetes [8, 15–21]. The convergence suggests that  $\alpha$ Klotho deficiency is a generic consequence of nephron loss.  $\alpha$ Klotho reduction is potentially a sensitive and early biomarker of CKD and prognostic of CKD complications [22]. Restoration of  $\alpha$ Klotho in experimental CKD in rodents ameliorates the kidney disease and extra-renal complications [8, 19, 20], which expands the role of  $\alpha$ Klotho beyond biomarker and transforms the landscape presenting  $\alpha$ Klotho replacement as a potential therapy.  $\alpha$ Klotho deficiency has also been documented in acute kidney injury (AKI) in both rodents and humans [23].  $\alpha$ Klotho can potentially serve as an early biomarker for AKI [24]. In addition,  $\alpha$ Klotho was shown in rodents to prevent AKI from nephrotoxin [25], ischemia reperfusion [23] and ureteral obstruction [26], the most common causes of human AKI.

$\alpha$ Klotho measurement and replacement are pivotal advancements in kidney disease from diagnostic, prognostic and therapeutic points of view. However, one must first establish whether the preclinical findings are pertinent to human CKD. Low  $\alpha$ Klotho transcript and protein have been described in human kidney from nephrectomy samples of end-stage kidneys and biopsies from patients with CKD [18, 27], but tissue levels have limited clinical utility. Studies using an immune-based assay have shown widely disparate results in terms of absolute values of serum  $\alpha$ Klotho concentration and direction of change (increased, decreased or no change) with CKD and age [18, 28–49]. These discrepancies have thwarted progress and incapacitated our ability to determine whether the rodent data can be translated into meaningful human application.

In addition to CKD, AKI from a variety of causes is also associated with rapid and dramatic decrease of  $\alpha$ Klotho in the kidney [23, 26, 50–53] and serum [23] in rodents and in urine in humans [23]. There is no data on human serum  $\alpha$ Klotho in AKI to date. There is a dire need for an early, sensitive and specific marker for AKI in humans [54]. An accurate and reproducible assay is absolutely pivotal to generate such databases.

Generating antibodies to conserved proteins is challenging, as animal immunization and antibody production are subject to protection against auto-immunity. Synthetic antibody technology offers a powerful alternative because it is applied under defined *in vitro* conditions, uses antibody libraries that are not subjected to tolerance selection to remove self-reactive antibodies and yields antibodies with high affinities and specificities [55–59]. Within an optimized antibody framework,

sequence diversity is introduced into the complementary determining regions (CDRs) by combinatorial mutagenesis. These libraries are coupled with phage display, with each phage particle displaying a unique antigen-binding fragment (Fab) on its surface while carrying the encoding DNA internally, thus achieving direct phenotype–genotype relations. Fab-displaying phages that bind to an antigen of interest are enriched using binding selections with purified antigens on solid support. The CDRs of binding phage clones are identified by DNA sequencing, and the Fab proteins are purified from bacteria or converted to the full-length IgG in mammalian cells.

Driven by the need for highly specific anti- $\alpha$ Klotho antibodies to develop reliable high-throughput diagnostic assays, we screened a synthetic antibody library and generated a Fab with high affinity for human and rodent  $\alpha$ Klotho. We characterized this novel antibody, sb106, using recombinant proteins, cultured cells and body fluids and tissues from humans and rodents. We accurately and precisely quantified  $\alpha$ Klotho levels in serum and urine in human and rodents using immunoprecipitation and immunoblot (IP-IB), and we demonstrated that both serum and urine  $\alpha$ Klotho are dramatically reduced in early human CKD. While IP-IB is too cumbersome for large a sample size, our work lays the foundation to eventually produce high-throughput assays that enable large-scale population-based human studies that are direly needed. Finally, we strengthen a growing body of data supporting the hypothesis that CKD is a state of  $\alpha$ Klotho deficiency that is worthy of exploration in humans.

## MATERIALS AND METHODS

### Preparation of the binary $\alpha$ Klotho–FGFR1c complex

The ligand-binding domain of human fibroblast growth factor receptor (FGFR)1c (D142 to R365) was expressed in *Escherichia coli*, refolded *in vitro* from inclusion bodies, and purified by published methods [60, 61]. The extracellular domain of murine  $\alpha$ Klotho (A35 to K982) was expressed in human embryonic kidney (HEK)293 cells with a C-terminal FLAG tag, and the binary complex of the  $\alpha$ Klotho ectodomain and the FGFR1c ligand-binding domain was prepared as described [5].

### Isolation and characterization of sb106

Sb106 was isolated from a synthetic human Fab phage-displayed library (Library F) [62]. Binding selections, phage ELISAs and Fab protein purification were performed as described [55, 63, 64]. Briefly, phage from Library F were cycled through rounds of panning with the binary complex of  $\alpha$ Klotho extracellular domain and FGFR1c ligand-binding domain on 96-well Maxisorp Immunoplates (Fisher Scientific, Nepean, ON, Canada) as the capture target. After five rounds of selection, phage were produced from individual clones grown in a 96-well format and phage ELISAs were performed to detect specific binding clones. Clones with positive binding were subjected to DNA sequencing. A competitive binding ELISA was performed by pre-incubating sb106 phage with

serial dilutions of soluble human  $\alpha$ Klotho (50–0.0005 nM  $\times$  1 h) prior to binding to an ELISA plate coated with human  $\alpha$ Klotho. The genes encoding for variable heavy- and light-chain domains of sb106 were cloned into vectors designed for production of light chain or IgG1 heavy chain, respectively, and sb106-IgG was expressed from 293F cells (Invivogen, San Diego, CA, USA). Fab and IgG proteins were affinity-purified on Protein A affinity columns (GE Healthcare, Mississauga, ON, Canada).

### $\alpha$ Klotho assays

The ELISA was performed as per the manufacturer's protocol (Immuno-Biological Laboratory, Japan). For the IP-IB assay, 50  $\mu$ L of serum or urine were diluted with KRH buffer [25 mM HEPES–NaOH (pH 7.4), 120 mM NaCl, 5 mM KCl, 1.2 mM MgSO<sub>4</sub>, 1.3 mM CaCl<sub>2</sub>, 1.3 mM KH<sub>2</sub>PO<sub>4</sub>] to a final volume of 0.5 mL and incubated with 2  $\mu$ g of sb106-Fab (overnight at 4°C). Sepharose beads (50  $\mu$ L) conjugated with anti-FLAG antibody (50% v/v Flag-Tag M2 beads, Sigma–Aldrich A22201) were added, incubated (4 C  $\times$  2 h), washed ( $\times$ 3, KRH –500  $\mu$ L per tube  $\times$  3; 22°C) and pelleted (5000 g for 30 s). The immune complex was eluted with 2 $\times$  SDS sample loading buffer (50  $\mu$ L; 100 C  $\times$  3 min; 4 C  $\times$  3 min; spun) and removed to a separate siliconized tube. Twenty micrograms of the sample was fractionated by SDS–PAGE, transferred to nitrocellulose membranes, blocked (5% milk, 1 h, 22°C) and incubated with a primary anti- $\alpha$ Klotho antibody (KM2076, 3.1 mg/mL, 1:5000 dilution) and diluent (Dako#S3022, Carpinteria, CA, USA) overnight (4°C, rocker). The membrane was washed ( $\times$ 3, Tris-buffered saline with 0.1% Tween; TBS–T), exposed to ECL™ anti-rat IgG (NA935, GE Healthcare in 5% milk/TBS–T  $\times$  1 h) and washed ( $\times$ 3 TBS–T). For chemiluminescence, the membrane was covered with SuperSignal West Femto Maximum Sensitivity substrate (Thermo Scientific, Rockford, IL, USA) and exposed for 30–90 s. The 130-kD bands were scanned, and density was compared with internal control samples of known amounts of Klotho using Adobe Photoshop CS4. The supplement contains the entire bench protocol in detail.

## RESULTS

### Identification of an anti- $\alpha$ Klotho synthetic Fab

After rounds of biopanning of a phage-displayed synthetic Fab library on recombinant  $\alpha$ Klotho ectodomain complexed with the ligand-binding domain of FGFR1c, we identified several binding phages. Clone sb106 (Figure 1A) was chosen for further characterization based on binding specificity. In phage ELISA (Figure 1B), sb106 phage bound to both human and mouse  $\alpha$ Klotho, demonstrating cross-species reactivity, and to either  $\alpha$ Klotho alone or in complex with FGFR1c, indicating that its epitope is not obscured by co-receptor complex formation. Sb106 phage did not bind to FGFR1c alone, neutra-vidin (NAV) or bovine serum albumin (BSA). Sb106 binds to human  $\alpha$ Klotho with affinity in the single-digit nanomolar range ( $IC_{50}$  = 1.7 nM, Figure 1C). Sb106-Fab also binds with

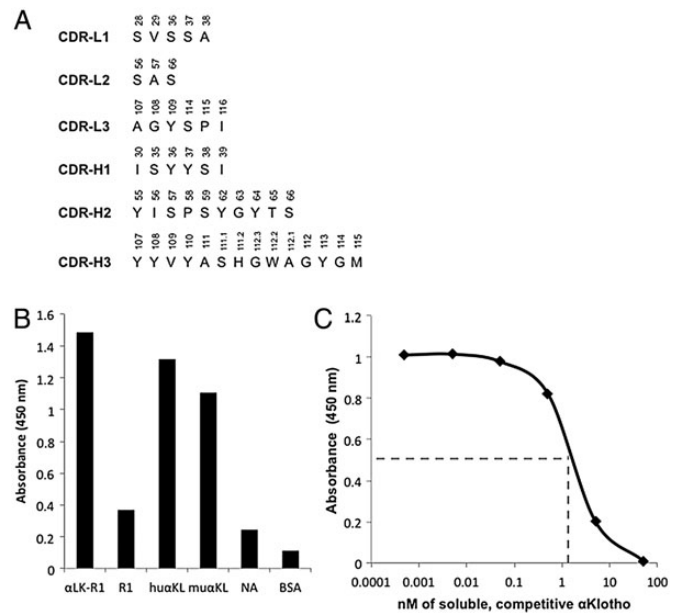

**FIGURE 1:** Sequence, specificity and affinity of sb106 (A) Sequences of the CDRs of sb106 in the IMGT numbering scheme [69]. (B) Specificity of sb106 by phage ELISA. Sb106 phage were assayed for binding to the following immobilized proteins: human  $\alpha$ Klotho (Hu  $\alpha$ KL), mouse  $\alpha$ Klotho (Mu  $\alpha$ KL), complex of the extracellular domain of mouse  $\alpha$ Klotho and the ligand-binding domain of human FGFR1c (Mu  $\alpha$ KL:FGFR1c), ligand-binding domain of human FGFR1c (FGFR1c), neutra-vidin (NAV), and bovine serum albumin (BSA). (C) Estimation of the affinity of sb106 for  $\alpha$ Klotho by competitive phage ELISA. Sb106 phage were pre-incubated with serial dilutions of human  $\alpha$ Klotho (*x*-axis), prior to capture with immobilized antigen and detection by a colorimetric assay (*y*-axis).

high affinity to the binary  $\alpha$ Klotho–FGFR1c complex immobilized on a biosensor chip, and it does not interfere with ternary complex formation between FGF23,  $\alpha$ Klotho and FGFR1c (Supplementary Figure 1).

### Characterization of the anti- $\alpha$ Klotho Fab sb106

Using the unique CDR sequences of sb106 (Figure 1A), both Fab and full-length IgG proteins were produced. sb106 was highly reactive against  $\alpha$ Klotho under native conditions. Immunoblot signals under denaturing conditions against mouse, rat and human kidney tissue were weak, but in samples from transgenic mice overexpressing  $\alpha$ Klotho [2], sb106-Fab detected a band corresponding to the full-length extracellular domain of  $\alpha$ Klotho (Figure 2A). In cultured cells, sb106-Fab cannot detect  $\alpha$ Klotho in immunoblots under denaturing conditions with lysates from normal rat kidney cells expressing small amounts of native  $\alpha$ Klotho but can detect the antigen in HEK293 cell lysates overexpressing  $\alpha$ Klotho (Figure 2B). In immunohistochemistry with freshly frozen unfixed rat parathyroid tissue (and other tissues known to express  $\alpha$ Klotho, data not shown), sb106-IgG detected  $\alpha$ Klotho but the same tissue was negative when fixed (Figure 2C), compatible with the fact that sb106 binds only to the native  $\alpha$ Klotho (Figure 1B). In immunocytochemistry of freshly fixed cells,

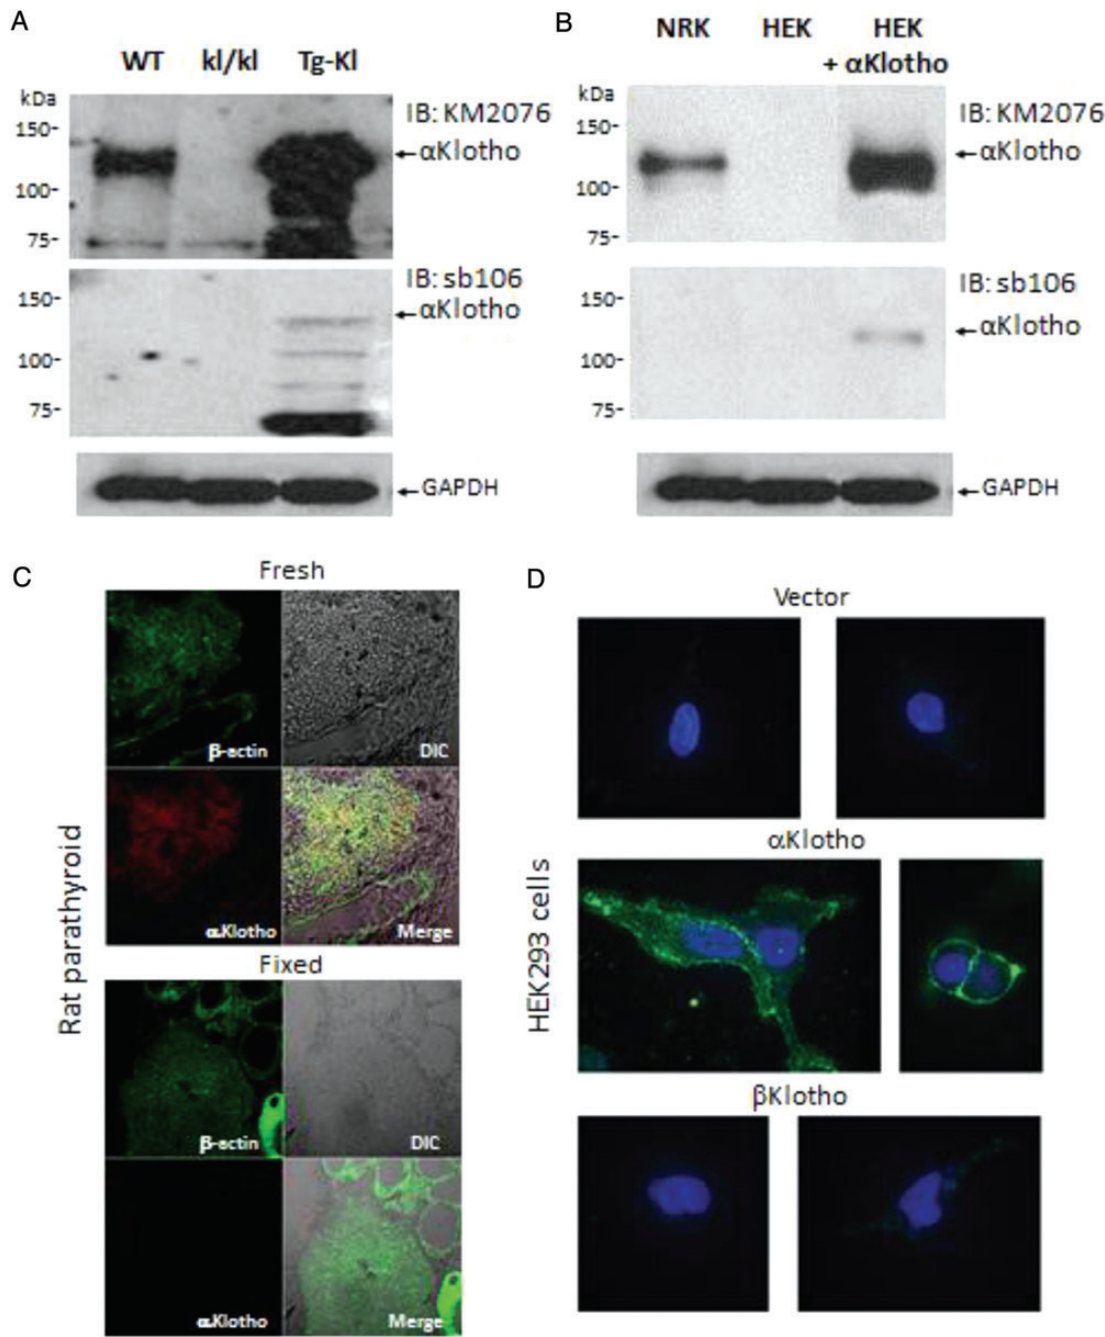

**FIGURE 2:** Characterization of sb106-Fab by immunoblot, immunohistochemistry and immunocytochemistry (A) Immunoblot of kidney lysate from wild-type (WT) mice, homozygous  $\alpha$ Klotho hypomorphic mice (*kl/kl*) and transgenic  $\alpha$ Klotho-overexpressing mice (Tg-Kl), using the monoclonal antibody KM2076 or the sb106-Fab. GAPDH: glyceraldehyde phosphate dehydrogenase. (B) Immunoblot of lysates from normal rat kidney (NRK) cells, human embryonic kidney (HEK) cells and HEK cells transfected with a plasmid for over-expression of  $\alpha$ Klotho, using the monoclonal antibody KM2076 or the sb106-Fab. (C) Fresh or fixed rat parathyroid tissue probed with phalloidin for  $\beta$ -actin (green) or sb106-IgG (red). (D) HEK293 cells transfected with empty vector or vector for over-expression for  $\alpha$ Klotho or  $\beta$ Klotho, stained with sb106-Fab (green) and DAPI (blue).

there was unequivocal staining in HEK293 cells heterologously overexpressing  $\alpha$ Klotho but not in cells overexpressing  $\beta$ Klotho (Figure 2D). Even in cells overexpressing  $\alpha$ Klotho, prolonged fixation greatly diminished or abolished the staining with sb106 (data not shown). In sum, sb106 reacts specifically with native human, rat and mouse  $\alpha$ Klotho but not with denatured  $\alpha$ Klotho.

#### Immunoprecipitation of $\alpha$ Klotho

We tested the ability of sb106-Fab to precipitate soluble  $\alpha$ Klotho using a sequential IP-IB assay. Sb106-Fab pulled-down  $\alpha$ Klotho from total cell lysates and conditioned cell culture medium and from  $\alpha$ Klotho-overexpressing cells (Figure 3A). We compared the sb106-Fab pull-down with that of an anti-FLAG antibody using soluble  $\alpha$ Klotho with a

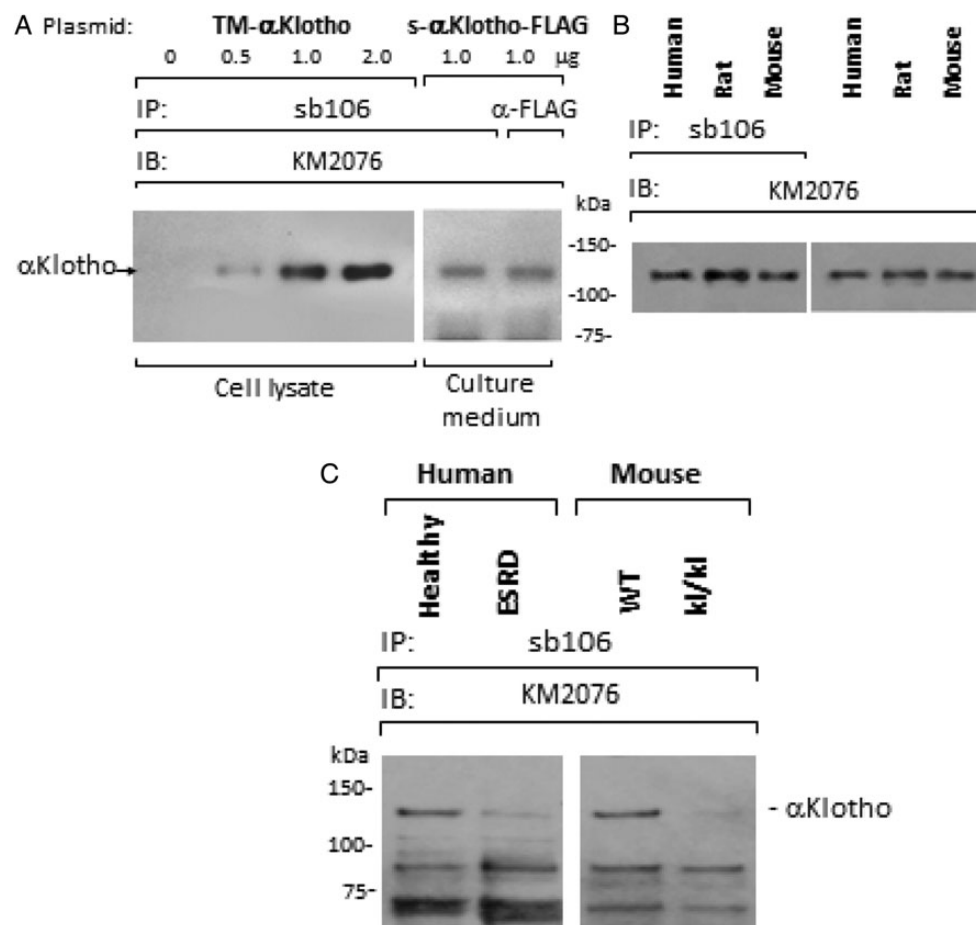

**FIGURE 3:** Characterization of sb106-Fab by immunoprecipitation. (A) HEK293 cells were transfected with empty vector or varying quantities ( $\mu$ g/dish) of vector for expression of transmembrane full-length  $\alpha$ Klotho (TM- $\alpha$ Klotho) or soluble extracellular domain of  $\alpha$ Klotho with a C-terminal FLAG epitope (s-  $\alpha$ Klotho-FLAG). Cell lysates or cell culture medium was immunoprecipitated (IP) with either sb106-Fab or anti-FLAG MAb. Immunocomplexes were resolved by SDS-PAGE and immunoblotted (IB) with monoclonal anti- $\alpha$ Klotho antibody KM2076. (B) Urine from rat, mouse or human was immunoprecipitated with sb106-Fab, resolved by SDS-PAGE and immunoblotted (IB) with KM2076 (left three lanes). Size-selected urine (100-kDa cutoff) was directly subjected to SDS-PAGE and immunoblotted (right three lanes). (C) Sera from a healthy volunteer (healthy), a patient with end-stage renal disease (ESRD), WT mice and homozygous Klotho hypomorphic mice with systemic Klotho deficiency (*kl/kl*) were subjected to immunoprecipitation by sb106-Fab and immunoblot by KM2076.

C-terminal FLAG tag in HEK293 cells. Sb106-Fab and anti-FLAG precipitated proteins with the exact same electrophoretic mobilities.

Sb106-Fab precipitated an  $\sim$ 130-kDa protein from human, mouse and rat sera that reacted with the anti- $\alpha$ Klotho antibody KM2076 (Figure 3B). Immunoprecipitation from urine also showed an  $\sim$ 130-kDa band (Figure 3B). To further support the authenticity of the IP-IB band by sb106, we examined the intensity of this band in human sera from a normal individual versus a patient with CKD stage 5, and sera from a wild-type mouse versus a homozygous  $\alpha$ Klotho hypomorph (Figure 3C). Only the  $\sim$ 130-kDa band (Figure 3C) was reduced in human advanced CKD and was absent in the  $\alpha$ Klotho-deficient mice (*kl/kl*) [1]. The mobility of the full-length soluble  $\alpha$ Klotho and transmembrane  $\alpha$ Klotho is identical on SDS-PAGE, and there is no reagent that recognizes the short intramembranous region so one cannot distinguish the two species by IP-IB. However, the probability of a transmembrane protein circulating in the blood is extremely low.

### $\alpha$ Klotho levels in human CKD

We evaluated whether the IP-IB method can reliably determine serum  $\alpha$ Klotho levels from a single-center database of CKD patients. We spiked in known amounts of recombinant human  $\alpha$ Klotho to test the linearity of the assay as well as the extrapolated  $y$ -intercept. IP-IB was performed with sera from a normal healthy volunteer and a patient with stage 5 CKD spiked with a range of different concentrations of recombinant  $\alpha$ Klotho (Figure 4A). There was graded increase in signal with the incrementally inoculated exogenous  $\alpha$ Klotho. The serum from the CKD patient also showed increases in signal with increasing exogenous  $\alpha$ Klotho but, at any given concentration of  $\alpha$ Klotho, the signal intensity was lower than the normal serum.

The serum from the healthy volunteer gave the same signal in the absence or presence of a protease inhibitor cocktail, whereas serum from the CKD patient displayed an increase in measured  $\alpha$ Klotho levels with protease inhibition (Figure 4B). This suggests that while endogenous  $\alpha$ Klotho exists in a stable

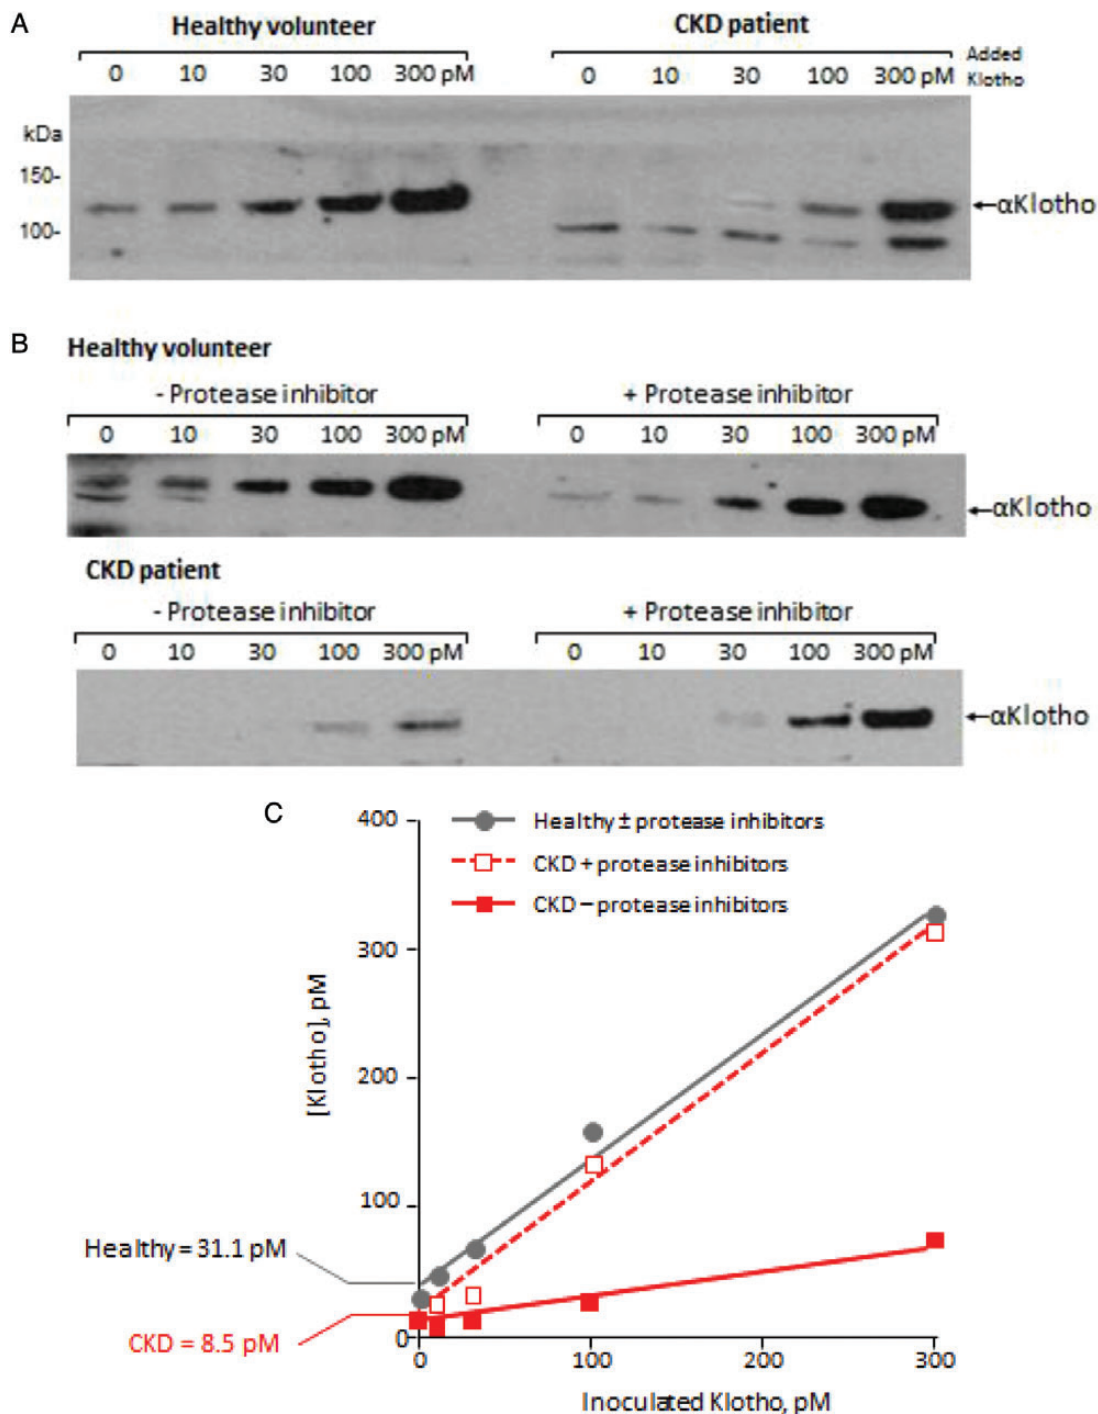

**FIGURE 4:** Validation of IP-IB assay using human serum spiked with recombinant  $\alpha$ Klotho. (A) Known amounts of soluble human  $\alpha$ Klotho ectodomain were added to sera from a healthy volunteer or an anuric dialysis patient (CKD patient).  $\alpha$ Klotho was measured in the sera using the IP-IB assay. (B) Similar experiment as in (A) except comparisons was made where protease inhibitors (AEBSF 0.1 mM, aprotinin 0.3  $\mu$ M, bestatin 10  $\mu$ M, E-64 1  $\mu$ M, leupeptin 50  $\mu$ M, pepstatin A 1  $\mu$ M) were either included or excluded from the IP. (C)  $\alpha$ Klotho levels determined by IP-IB (y-axis) were plotted against the added recombinant  $\alpha$ Klotho (x-axis) in the four conditions described earlier. Extrapolation to zero spiking shows the level of endogenous  $\alpha$ Klotho in the serum treated with protease inhibitors. Only one line is shown for healthy serum with or without protease inhibitors as the results were indistinguishable.

steady state in uremia, exogenously added  $\alpha$ Klotho may undergo proteolysis in uremic but not in normal serum. A quantitative summary of the spiking experiment is shown in Figure 4C. Both healthy and CKD sera showed linear responses to  $\alpha$ Klotho inoculation, but the signal from CKD sera has a lower slope.

When protease inhibitors were included, the slope of the CKD line approached that of the healthy subject without affecting its intercept. Extrapolation to zero inoculation showed that the serum from the normal individual had 31.1 pM  $\alpha$ Klotho whereas that from the CKD patient had 8.5 pM  $\alpha$ Klotho. Similar

extrapolations were obtained from a number of subjects with normal renal function or CKD (data not shown).

The constituents of our CKD clinic closely resemble the national profile of CKD where diabetes and hypertension predominate (Table 1). Despite the scatter, there is a clear progressive decline of  $\alpha$ Klotho with stages of CKD (Figure 5A). The decrease in serum  $\alpha$ Klotho occurred early in CKD and preceded high FGF23, high PTH and hyperphosphatemia (Table 1). We directly compared the IP-IB assay with a commercial  $\alpha$ Klotho ELISA kit using the same samples (Figure 5B). Overall, there is correlation between the two, but there is separation on both sides of the line of identity. In fresh samples, the ELISA shows higher values than IP-IB (gray diamonds to the left of the line of identity, Figure 5B), but in samples that have been through one or more cycles of freeze-thaw, the ELISA values are much lower (black diamonds to the right of the line of identity, Figure 5B). When the exact same samples were tested by the two methods before and after repeated freeze-thaw, the IP-IB assay gave more stable results while the ELISA values dropped (Figure 5C).

We previously described low urinary  $\alpha$ Klotho in human CKD patients by directly immunoblotting urine [8]. The IP-IB assay with sb106-Fab showed dramatic reduction of urinary  $\alpha$ Klotho in CKD patients (Figure 6A). In contradistinction from serum, the ELISA yielded more comparable values to the IP-IB assay in the urine, but the magnitude of decrease in  $\alpha$ Klotho concentration is more dramatic when detected by the IP-IB assay than by ELISA (Figure 6B). These results unequivocally showed that human CKD is a state of  $\alpha$ Klotho deficiency in both serum and urine.

## DISCUSSION

### Impact of synthetic antibody technology on basic and clinical research

Antibody-based reagents are invaluable tools for both research and clinical applications for detection of proteins, protein isolation and purification, and numerous downstream applications. We developed a synthetic antibody to enhance our understanding of the role of  $\alpha$ Klotho in CKD. The ability to consistently and reliably detect  $\alpha$ Klotho in samples from both humans and rodents is of significant value. The commercial reagents available are limiting; there are no antibodies for specifically detecting native, folded  $\alpha$ Klotho protein. Moreover, the commercial ELISA kit for  $\alpha$ Klotho detection yields highly variable results, and a description of its components is not publicly available.

Synthetic antibodies with designed antigen-binding sites are fine-tuned and tailored for molecular recognition of vast repertoires of targets. Coupled with *in vitro* phage display, selections are performed in the absence of tolerance mechanisms that eliminate self-reactive antibodies. Selections with our library yielded sb106, an antibody with exquisite specificity for native human, mouse and rat  $\alpha$ Klotho, making it an ideal affinity reagent for the study of  $\alpha$ Klotho levels in the sera and urine of multiple species.

**Table 1. Characteristics of human subjects.**

| Subject  | n  | Age years | Gender M/F | PiCr [mg/dL ( $\mu$ M)]            | Serum Pi [mg/dL (mmol)]              | Serum PTH [pg/mL (pm)] | FGF23 [pg/mL]                 | 25(OH)vitamin D ng/mL (nm)        | Etiology of CKD (number of subjects) |
|----------|----|-----------|------------|------------------------------------|--------------------------------------|------------------------|-------------------------------|-----------------------------------|--------------------------------------|
| Healthy  | 34 | 50 ± 17   | 14/20      | 3.6 ± 0.6 (1.2 ± 0.2)              | 59 ± 25 (5.9 ± 2.5)                  | 30 ± 10                | 32 ± 10 (80 ± 25)             | None                              |                                      |
| CKD1     | 10 | 43 ± 10   | 7/3        | 3.9 ± 0.5 (1.3 ± 0.2)              | 47 ± 19 (4.7 ± 1.9)                  | 61 ± 23                | 26 ± 7 (65 ± 18)              | DM (1), HTN (3), GN (7)           |                                      |
| CKD2     | 11 | 50 ± 22   | 4/7        | 3.6 ± 0.5 (1.2 ± 0.2)              | 56 ± 22 (5.6 ± 2.2)                  | 70 ± 27                | 21 ± 13 (53 ± 33)             | DM (2), HTN (4), GN (4), RK (3)   |                                      |
| CKD3     | 10 | 57 ± 17   | 5/5        | 3.2 ± 0.8 (1.0 ± 0.3)              | 86 ± 51 (8.6 ± 5.1)                  | 79 ± 18 <sup>a</sup>   | 25 ± 8 (63 ± 20)              | DM (3), HTN (7), GN (3), IN (1)   |                                      |
| CKD4     | 14 | 62 ± 13   | 8/6        | 2.7 ± 0.6 (238 ± 53) <sup>a</sup>  | 202 ± 101 (20.2 ± 10.1) <sup>a</sup> | 204 ± 173 <sup>a</sup> | 21 ± 8 (53 ± 20) <sup>a</sup> | DM (4), HTN (10), GN (3), RK (1)  |                                      |
| CKD5     | 11 | 62 ± 9    | 5/6        | 4.7 ± 2.0 (413 ± 18) <sup>a</sup>  | 223 ± 188 (22.3 ± 18.8) <sup>a</sup> | 580 ± 427 <sup>a</sup> | 21 ± 9 (53 ± 23) <sup>a</sup> | DM (7), HTN (7), GN (2)           |                                      |
| Dialysis | 14 | 50 ± 12   | 6/8        | 4.8 ± 0.9 (1.7 ± 0.5) <sup>a</sup> | 500 ± 650 (50.0 ± 65.0) <sup>a</sup> | 760 ± 286 <sup>a</sup> | 26 ± 8 (65 ± 20)              | DM (7), HTN (10), GN (5), PKD (1) |                                      |

n, number of subjects; PiCr, plasma creatinine; serum Pi, serum inorganic phosphate; PTH, parathyroid hormone; FGF23, fibroblast growth factor 23; DM, diabetes mellitus; HTN, hypertension; GN, glomerulonephritis; RK, remnant kidney; IN, interstitial nephritis; PKD, polycystic kidney disease. Some patients carried more than one diagnosis. Results are shown as mean ± standard deviation.  
<sup>a</sup>P < 0.05 compared with healthy volunteers by ANOVA.

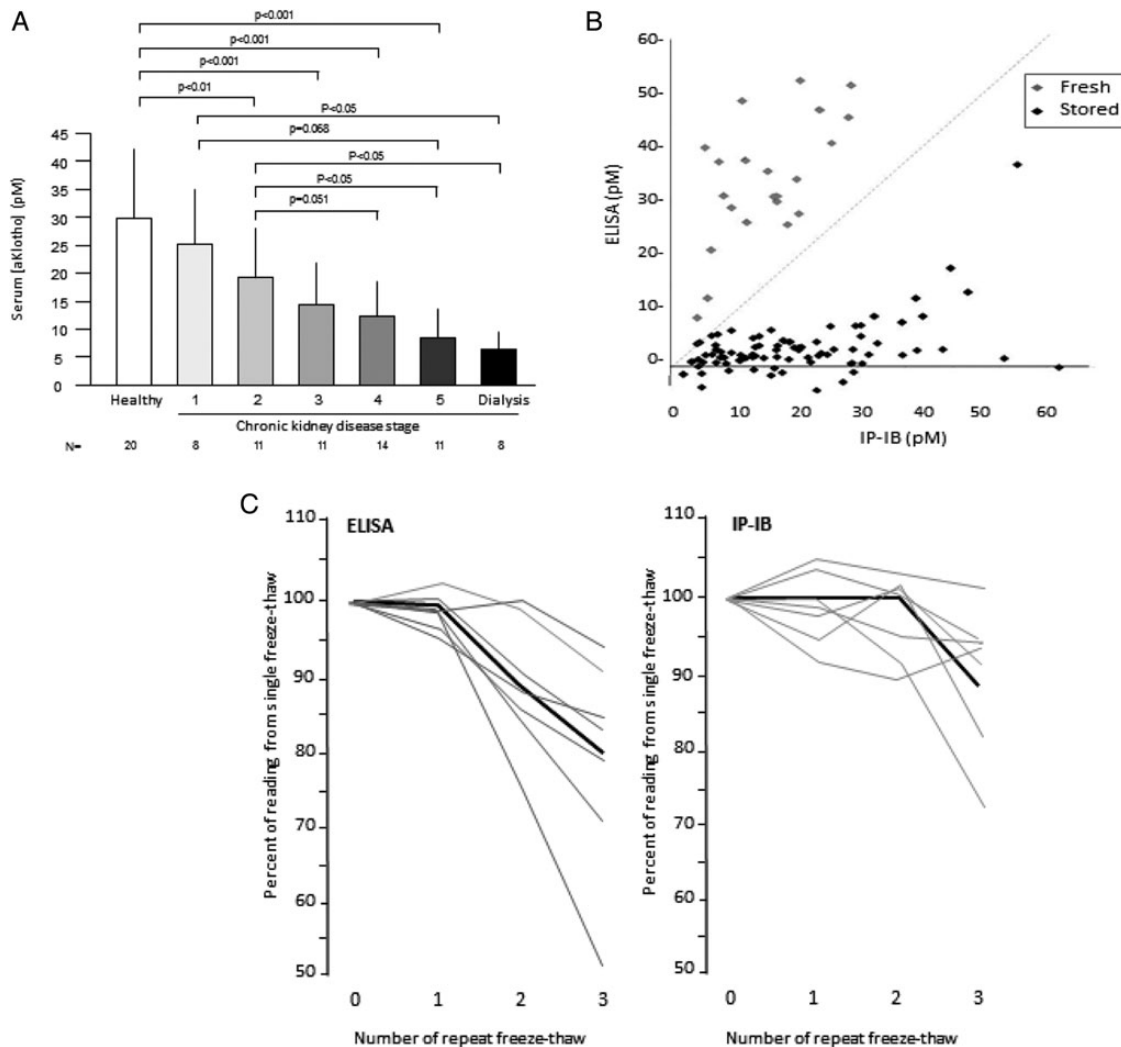

**FIGURE 5:** IP-IB assay of serum  $\alpha$ Klotho in humans with chronic kidney disease. (A)  $\alpha$ Klotho was measured by the IP-IB assay in human sera from normal healthy volunteers and patients from a CKD clinic and dialysis unit using the conventional numerical staging using recombinant  $\alpha$ Klotho as a calibration curve. Bars and error bars denote means and standard deviations. The data were analyzed by ANOVA followed by Student–Newman–Keuls test for pairwise multiple comparisons. P-values achieving statistical significance between groups are indicated above the brackets. The number of subjects in each group is indicated at the bottom. (B) The concentrations of  $\alpha$ Klotho in a large variety of human sera were determined either by IP-IB (x-axis) or by a commercial ELISA (y-axis) in the same samples. The dotted line represents identity. The black diamonds represent sera that have been through one or more freeze-thaw cycles (stored), and the gray diamonds represent sera thawed only once (fresh). (C) Sera from human subjects were assayed by IP-IB and ELISA. The same sera were subjected to the indicated cycles of repeated freeze-thaw and then assayed. Results for each sample were expressed as a percentage of the reading from the same sample thawed only once. The heavy lines denote the mean of the different subjects.

### Biologic and clinical implications of $\alpha$ Klotho deficiency in CKD

In addition to its role in mineral metabolism, soluble  $\alpha$ Klotho circulates in many bodily fluids and has multiple ‘house-keeping’ functions that maintain cellular integrity throughout the body. Although the mechanism of action of soluble  $\alpha$ Klotho remains poorly understood, the biologic impact of  $\alpha$ Klotho deficiency is unequivocally shown [65].  $\alpha$ Klotho transcripts are present in multiple organs, but the kidney by far has the highest expression [1]. CKD is a state of multiple metabolic derangements and is a complex syndrome from the accumulation of under-excreted endogenous and exogenous toxins as well as deficiency in substances normally responsible for health maintenance.

There is unequivocal evidence in experimental animals that both AKI and CKD are states of systemic  $\alpha$ Klotho deficiency. Not only is this a sensitive biomarker, restoration of  $\alpha$ Klotho ameliorates renal dysfunction. Independent from its renoprotective effects,  $\alpha$ Klotho also reduces extra-renal complications in CKD [8, 66]. The preclinical data suggest that  $\alpha$ Klotho can have significant diagnostic, prognostic and therapeutic value in human AKI and CKD, yet a robust database is not currently available.

### Validation of the IP-IB assay and comparison with the commercial ELISA

In addition to retrospective or cross-sectional data, population-based multicenter prospective human studies are required



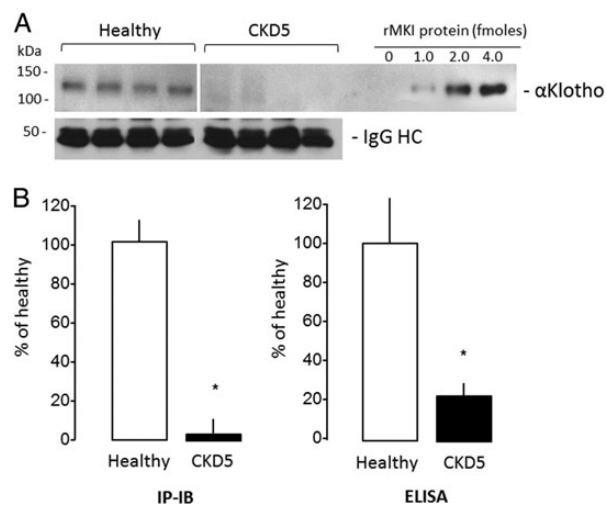

**FIGURE 6:** Human urinary  $\alpha$ Klotho levels.  $\alpha$ Klotho was measured in the urine of healthy volunteers or patients with chronic kidney disease stage 5 (CKD5). (A) A representative IP-IB assay using recombinant murine  $\alpha$ Klotho (rMK1) as a calibration with four subjects in each group under steady state conditions. Equal amounts of urine creatinine were used for IP-IB. (B) Summary of the data from the IP-IB assay and the commercial ELISA. Bars and error bars represent mean and standard deviation from eight subjects in each group. The mean of the healthy volunteers was set as a reference of 100%.

to determine the diagnostic and prognostic value of  $\alpha$ Klotho. Interventional studies also need monitoring of serum  $\alpha$ Klotho levels. A specific reproducible high-throughput assay is essential for the field to move forward.

Currently available commercial assays have no consistent correlation between them [35, 67]. Studies in healthy humans and CKD patients based on one ELISA [47] have yielded baffling results. The absolute levels of  $\alpha$ Klotho in normal and CKD ranged from 0.4 [36] to over 2000 pg/mL [30] with most readings in the hundreds [37, 39, 44, 47–49, 67]. Based on this assay,  $\alpha$ Klotho levels have been described to be low [37, 41, 43, 46–48], no relationship to [29, 30, 39, 40, 42] or increased [33, 36] with decreasing glomerular filtration rate. Likewise,  $\alpha$ Klotho levels have been reported as not changed or decreased with age [31, 42, 47, 48]. This renders the interpretation of human  $\alpha$ Klotho data difficult, and the collective data derived from different centers have no value. There is also no published data on the reagents, namely, the antibodies that form the foundation of this assay.

We generated a high-affinity synthetic antibody that recognizes  $\alpha$ Klotho in its native conformation (Figures 1–3). Sb106-Fab or IgG pulls down  $\alpha$ Klotho from cell lysate, culture medium, serum and urine. Additional bands may be shorter fragments of  $\alpha$ Klotho, but the intensity of these bands did not decrease in the *kl/kl* mice, which argue against this possibility. We have limited our analysis to the ~130-kDa band, which is unequivocally full-length soluble  $\alpha$ Klotho, something that the ELISA cannot achieve.

The linearity of the spiking experiment indicates that the inoculated  $\alpha$ Klotho is detected (Figure 4). An unexpected finding was that exogenously added recombinant  $\alpha$ Klotho is proteolytically degraded in uremic serum whereas no such

phenomenon was observed in normal sera. This challenges the view that the low  $\alpha$ Klotho in kidney disease stems solely from decreased production and opens up additional mechanisms and new avenues for investigation. In addition to uncovering new mechanisms of  $\alpha$ Klotho deficiency in CKD, this may have significant implications in terms of recombinant  $\alpha$ Klotho replacement as some strategy has to be devised to stabilize exogenously administered recombinant  $\alpha$ Klotho.

There is graded reduction in serum  $\alpha$ Klotho with advancing CKD (Figure 5A). The broad range of values within each group is not due to assay variations but is in fact biologic. The coefficient of variation of the IP-IB assay was 4% for serum and 7% for urine (data not shown). There are many factors that can affect  $\alpha$ Klotho levels, and they are certainly not controlled in this study. The IP-IB assay also showed low urinary  $\alpha$ Klotho in advanced CKD (Figure 6). In fact, the reduction in urinary  $\alpha$ Klotho is more dramatic than that in serum and may represent a more sensitive marker for CKD.

Both IP-IB and the commercial ELISA detected the low urine  $\alpha$ Klotho in CKD, although the absolute levels of  $\alpha$ Klotho are higher with the ELISA assay and the percent reduction is not the same as with the IP-IB assay. With drastic reduction in urinary  $\alpha$ Klotho levels in CKD, the two assays yielded the same conclusion but with quantitative differences. The situation in serum is different. Although there is overall positive correlation, the comparison of the two assays segregated into two groups (Figure 5B). The fresh samples showed higher readings for the ELISA whereas the stored samples yielded very low levels with the ELISA. The ELISA may be measuring  $\alpha$ Klotho and other cross-reacting proteins in fresh samples. While the IP-IB assay did lose some efficacy with repeated freeze-thaw, this is a much more serious problem with the ELISA. Since most clinical sample banking involves freezing and sometimes the samples were thawed for measurement of other parameters, this may explain some of the large variations in the current literature where freeze-thaw of banked samples is common.

Another advantage of the IP-IB assay is that it detects  $\alpha$ Klotho in both humans and rodents equally well, whereas the use of the currently available ELISA in rodent can potentially be problematic as it detects very high circulating  $\alpha$ Klotho levels in rats with CKD, which is a well-documented state of pan- $\alpha$ Klotho deficiency [68]. It should be emphasized that the IP-IB is still very much a tool for laboratory animal and smaller-scale human metabolic studies. The labor intensity and the fact that IB is less quantitative than ELISA do not render this format of the  $\alpha$ Klotho assay ideal for large population-based epidemiologic work. These antibodies, along with proper sample handling, can be optimized for a high-throughput format and will be powerful tools not only for animal studies but also for large-scale clinical studies.

## SUPPLEMENTARY DATA

Supplementary data are available online at <http://ndt.oxfordjournals.org>.

## ACKNOWLEDGEMENTS

The studies were supported by the National Institutes of Health (R01DK091392, R01-DK092461 and R01DE13686), the Canadian Institutes of Health Research (MOP-93725), the O'Brien Center of Kidney Research (P30 DK-079328), the Simmons Family Foundation and the Charles and Jane Pak Foundation.

## REFERENCES

1. Kuro-o M, Matsumura Y, Aizawa H *et al.* Mutation of the mouse klotho gene leads to a syndrome resembling ageing. *Nature* 1997; 390: 45–51
2. Kurosu H, Yamamoto M, Clark JD *et al.* Suppression of aging in mice by the hormone Klotho. *Science* 2005; 309: 1829–1833
3. Hu MC, Shi M, Zhang J *et al.* Klotho: a novel phosphaturic substance acting as an autocrine enzyme in the renal proximal tubule. *FASEB J* 2010; 24: 3438–3450
4. Kato Y, Arakawa E, Kinoshita S *et al.* Establishment of the anti-Klotho monoclonal antibodies and detection of Klotho protein in kidneys. *Biochem Biophys Res Commun* 2000; 267: 597–602
5. Goetz R, Nakada Y, Hu MC *et al.* Isolated C-terminal tail of FGF23 alleviates hypophosphatemia by inhibiting FGF23-FGFR-Klotho complex formation. *Proc Natl Acad Sci USA* 2010; 107: 407–412
6. Kurosu H, Ogawa Y, Miyoshi M *et al.* Regulation of fibroblast growth factor-23 signaling by klotho. *J Biol Chem* 2006; 281: 6120–6123
7. Urakawa I, Yamazaki Y, Shimada T *et al.* Klotho converts canonical FGF receptor into a specific receptor for FGF23. *Nature* 2006; 444: 770–774
8. Hu MC, Shi M, Zhang J *et al.* Klotho deficiency causes vascular calcification in chronic kidney disease. *J Am Soc Nephrol* 2011; 22: 124–136
9. Imura A, Iwano A, Tohyama O *et al.* Secreted Klotho protein in sera and CSF: implication for post-translational cleavage in release of Klotho protein from cell membrane. *FEBS Lett* 2004; 565: 143–147
10. Matsumura Y, Aizawa H, Shiraki-Iida T *et al.* Identification of the human klotho gene and its two transcripts encoding membrane and secreted klotho protein. *Biochem Biophys Res Commun* 1998; 242: 626–630
11. Bloch L, Sineshchekova O, Reichenbach D *et al.* Klotho is a substrate for alpha-, beta- and gamma-secretase. *FEBS Lett* 2009; 583: 3221–3224
12. Chen CD, Podvin S, Gillespie E *et al.* Insulin stimulates the cleavage and release of the extracellular domain of Klotho by ADAM10 and ADAM17. *Proc Natl Acad Sci USA* 2007; 104: 19796–19801
13. Hu MC, Shi M, Zhang J *et al.* Renal production and metabolism of circulating Klotho. Submitted
14. Hu MC, Kuro-o M, Moe OW. Secreted klotho and chronic kidney disease. *Adv Exp Med Biol* 2012; 728: 126–157
15. Aizawa H, Saito Y, Nakamura T *et al.* Downregulation of the Klotho gene in the kidney under sustained circulatory stress in rats. *Biochem Biophys Res Commun* 1998; 249: 865–871
16. Cheng MF, Chen LJ, Cheng JT. Decrease of Klotho in the kidney of streptozotocin-induced diabetic rats. *J Biomed Biotechnol* 2010; 2010: 513853
17. Haruna Y, Kashihara N, Satoh M *et al.* Amelioration of progressive renal injury by genetic manipulation of Klotho gene. *Proc Natl Acad Sci USA* 2007; 104: 2331–2336
18. Koh N, Fujimori T, Nishiguchi S *et al.* Severely reduced production of Klotho in human chronic renal failure kidney. *Biochem Biophys Res Commun* 2001; 280: 1015–1020
19. Mitani H, Ishizaka N, Aizawa T *et al.* In vivo klotho gene transfer ameliorates angiotensin II-induced renal damage. *Hypertension* 2002; 39: 838–843
20. Wang Y, Sun Z. Klotho gene delivery prevents the progression of spontaneous hypertension and renal damage. *Hypertension* 2009; 54: 810–817
21. Zhao Y, Banerjee S, Dey N *et al.* Klotho depletion contributes to increased inflammation in kidney of the db/db mouse model of diabetes via RelA (serine)536 phosphorylation. *Diabetes* 2011; 60: 1907–1916
22. Hu MC, Kuro-o M, Moe OW. The emerging role of Klotho in clinical nephrology. *Nephrol Dial Transplant* 2012; 27: 2650–2657
23. Hu MC, Shi M, Zhang J *et al.* Klotho deficiency is an early biomarker of renal ischemia-reperfusion injury and its replacement is protective. *Kidney Int* 2010; 78: 1240–1251
24. Hu MC, Moe OW. Klotho as a potential biomarker and therapy for acute kidney injury. *Nat Rev Nephrol* 2012; 8: 423–429
25. Panesso MC, Shi M, Cho HJ *et al.* Dual protective effects of Klotho on cisplatin nephrotoxicity: inhibition of cisplatin uptake and cytoprotection. *Kidney Int* 2014; 85: 855–870
26. Doi S, Zou Y, Togao O *et al.* Klotho inhibits transforming growth factor-beta1 (TGF-beta1) signaling and suppresses renal fibrosis and cancer metastasis in mice. *J Biol Chem* 2011; 286: 8655–8665
27. Asai O, Nakatani K, Tanaka T *et al.* Decreased renal alpha-Klotho expression in early diabetic nephropathy in humans and mice and its possible role in urinary calcium excretion. *Kidney Int* 2012; 81: 539–547
28. Akimoto T, Kimura T, Watanabe Y *et al.* The impact of nephrectomy and renal transplantation on serum levels of soluble Klotho protein. *Transplant Proc* 2013; 45: 134–136
29. Akimoto T, Shiizaki K, Sugase T *et al.* The relationship between the soluble Klotho protein and the residual renal function among peritoneal dialysis patients. *Clin Exp Nephrol* 2012; 16: 442–447
30. Akimoto T, Yoshizawa H, Watanabe Y *et al.* Characteristics of urinary and serum soluble Klotho protein in patients with different degrees of chronic kidney disease. *BMC Nephrol* 2012; 13: 155
31. Carpenter TO, Insogna KL, Zhang JH *et al.* Circulating levels of soluble klotho and FGF23 in X-linked hypophosphatemia: circadian variance, effects of treatment, and relationship to parathyroid status. *J Clin Endocrinol Metab* 2010; 95: E352–E357
32. Crasto CL, Semba RD, Sun K *et al.* Relationship of low-circulating “anti-aging” klotho hormone with disability in activities of daily living among older community-dwelling adults. *Rejuvenation Res* 2012; 15: 295–301
33. Devaraj S, Syed B, Chien A *et al.* Validation of an immunoassay for soluble klotho protein: decreased levels in diabetes and increased levels in chronic kidney disease. *Am J Clin Pathol* 2012; 137: 479–485
34. Fliser D, Seiler S, Heine GH *et al.* Measurement of serum soluble Klotho levels in CKD 5D patients: useful tool or dispensable biomarker? *Nephrol Dial Transplant* 2012; 27: 1702–1703
35. Heijboer AC, Blankenstein MA, Hoenderop J *et al.* Laboratory aspects of circulating alpha-Klotho. *Nephrol Dial Transplant* 2013; 28: 2283–2287
36. Kacso IM, Bondor CI, Kacso G. Soluble serum Klotho in diabetic nephropathy: relationship to VEGF-A. *Clin Biochem* 2012; 45: 1415–1420
37. Kim HR, Nam BY, Kim DW *et al.* Circulating alpha-klotho levels in CKD and relationship to progression. *Am J Kidney Dis* 2013; 61: 899–909
38. Kitagawa M, Sugiyama H, Morinaga H *et al.* A decreased level of serum soluble Klotho is an independent biomarker associated with arterial stiffness in patients with chronic kidney disease. *PLoS One* 2013; 8: e56695
39. Komaba H, Koizumi M, Tanaka H *et al.* Effects of cinacalcet treatment on serum soluble Klotho levels in haemodialysis patients with secondary hyperparathyroidism. *Nephrol Dial Transplant* 2012; 27: 1967–1969
40. Pavik I, Jaeger P, Ebner L *et al.* Soluble klotho and autosomal dominant polycystic kidney disease. *Clin J Am Soc Nephrol* 2012; 7: 248–257
41. Pavik I, Jaeger P, Ebner L *et al.* Secreted Klotho and FGF23 in chronic kidney disease Stage 1 to 5: a sequence suggested from a cross-sectional study. *Nephrol Dial Transplant* 2013; 28: 352–359
42. Seiler S, Wen M, Roth HJ *et al.* Plasma Klotho is not related to kidney function and does not predict adverse outcome in patients with chronic kidney disease. *Kidney Int* 2013; 83: 121–128
43. Shimamura Y, Hamada K, Inoue K *et al.* Serum levels of soluble secreted alpha-Klotho are decreased in the early stages of chronic kidney disease, making it a probable novel biomarker for early diagnosis. *Clin Exp Nephrol* 2012; 16: 722–729
44. Siahianidou T, Garatzioti M, Lazaropoulou C *et al.* Plasma soluble alpha-klotho protein levels in premature and term neonates: correlations with growth and metabolic parameters. *Eur J Endocrinol* 2012; 167: 433–440
45. Sugiura H, Tsuchiya K, Nitta K. Circulating levels of soluble alpha-Klotho in patients with chronic kidney disease. *Clin Exp Nephrol* 2011; 15: 795–796

46. Wan M, Smith C, Shah V *et al.* Fibroblast growth factor 23 and soluble klotho in children with chronic kidney disease. *Nephrol Dial Transplant* 2013; 28: 153–161
47. Yamazaki Y, Imura A, Urakawa I *et al.* Establishment of sandwich ELISA for soluble alpha-Klotho measurement: age-dependent change of soluble alpha-Klotho levels in healthy subjects. *Biochem Biophys Res Commun* 2010; 398: 513–518
48. Yokoyama K, Imura A, Ohkido I *et al.* Serum soluble alpha-klotho in hemodialysis patients. *Clin Nephrol* 2012; 77: 347–351
49. Semba RD, Cappola AR, Sun K *et al.* Plasma klotho and mortality risk in older community-dwelling adults. *J Gerontol A Biol Sci Med Sci* 2011; 66: 794–800
50. Ohyama Y, Kurabayashi M, Masuda H *et al.* Molecular cloning of rat klotho cDNA: markedly decreased expression of klotho by acute inflammatory stress. *Biochem Biophys Res Commun* 1998; 251: 920–925
51. Sugiura H, Yoshida T, Mitobe M *et al.* Klotho reduces apoptosis in experimental ischaemic acute kidney injury via HSP-70. *Nephrol Dial Transplant* 2010; 25: 60–68
52. Sugiura H, Yoshida T, Tsuchiya K *et al.* Klotho reduces apoptosis in experimental ischaemic acute renal failure. *Nephrol Dial Transplant* 2005; 20: 2636–2645
53. Moreno JA, Izquierdo MC, Sanchez-Nino MD *et al.* The inflammatory cytokines TWEAK and TNFalpha reduce renal klotho expression through NFkappaB. *J Am Soc Nephrol* 2011; 22: 1315–1325
54. Goldstein SL. Acute kidney injury biomarkers: renal angina and the need for a renal troponin I. *BMC Med* 2011; 9: 135
55. Fellouse FA, Esaki K, Birtalan S *et al.* High-throughput generation of synthetic antibodies from highly functional minimalist phage-displayed libraries. *J Mol Biol* 2007; 373: 924–940
56. Gao J, Sidhu SS, Wells JA. Two-state selection of conformation-specific antibodies. *Proc Natl Acad Sci USA* 2009; 106: 3071–3076
57. Koellhoffer JF, Chen G, Sandesara RG *et al.* Two synthetic antibodies that recognize and neutralize distinct proteolytic forms of the Ebola virus envelope glycoprotein. *Chembiochem* 2012; 13: 2549–2557
58. Li B, Russell SJ, Compaan DM *et al.* Activation of the proapoptotic death receptor DR5 by oligomeric peptide and antibody agonists. *J Mol Biol* 2006; 361: 522–536
59. Uysal S, Vasquez V, Tereshko V *et al.* Crystal structure of full-length KcsA in its closed conformation. *Proc Natl Acad Sci USA* 2009; 106: 6644–6649
60. Ibrahim OA, Zhang F, Eliseenkova AV *et al.* Biochemical analysis of pathogenic ligand-dependent FGFR2 mutations suggests distinct pathophysiological mechanisms for craniofacial and limb abnormalities. *Hum Mol Genet* 2004; 13: 2313–2324
61. Plotnikov AN, Hubbard SR, Schlessinger J *et al.* Crystal structures of two FGF-FGFR complexes reveal the determinants of ligand-receptor specificity. *Cell* 2000; 101: 413–424
62. Persson H, Ye W, Wernimont A *et al.* CDR-H3 diversity is not required for antigen recognition by synthetic antibodies. *J Mol Biol* 2013; 425: 803–811
63. Rajan S, Sidhu SS. Simplified synthetic antibody libraries. *Methods Enzymol* 2012; 502: 3–23
64. Colwill K, Graslund S. A roadmap to generate renewable protein binders to the human proteome. *Nat Methods* 2011; 8: 551–558
65. Hu MC, Shiizaki K, Kuro-o M *et al.* Physiology and pathophysiology of an endocrine network of mineral metabolism. *Ann Rev Phys* 2013; 75: 503–533
66. Hu MC, Kuro-o M, Moe OW. Renal and extrarenal actions of Klotho. *Semin Nephrol* 2013; 33: 118–129
67. Pedersen L, Pedersen SM, Brasen CL *et al.* Soluble serum Klotho levels in healthy subjects. Comparison of two different immunoassays. *Clin Biochem* 2013; 46: 1079–1083
68. Fang Y, Ginsberg C, Sugatani T *et al.* Early chronic kidney disease-mineral bone disorder stimulates vascular calcification. *Kidney Int* 2013; 85: 142–150
69. Lefranc MP, Pommie C, Ruiz M *et al.* IMGT unique numbering for immunoglobulin and T cell receptor variable domains and Ig superfamily V-like domains. *Dev Comp Immunol* 2003; 27: 55–77

Received for publication: 9.5.2014; Accepted in revised form: 8.8.2014
